# Supplementary material for: Facile synthesis of ZnIn2S4@ZnS composites for efficient photocatalytic hydrogen precipitation
Source: Royal Society of Chemistry journal article supplement (doi:10.1039/d3cy01475d), 2023-12-11
Supplement: d3cy01475d1.pdf [file d3cy01475d1.pdf]

Supporting Information

**Facile synthesis of ZnIn<sub>2</sub>S<sub>4</sub>@ZnS composites for efficient photocatalytic hydrogen precipitation**

Xixi Yuan,<sup>a</sup> Peng Li,<sup>\*a</sup> Siyu Wang,<sup>a</sup> Puyu Liu,<sup>a</sup> Jianwei Zhao,<sup>\*b</sup> Tao Wang<sup>a</sup> and Kun Chang<sup>\*a</sup>

<sup>a</sup> Centre for Hydrogenenergy, College of Material Science and Engineering, Nanjing University of Aeronautics and Astronautics, Nanjing 210016, China

<sup>b</sup> School of Materials and Textile Engineering, Jiaying University, Jiaying 314041, China.

\*Corresponding Author:

E-mail: [LPeng@nuaa.edu.cn](mailto:LPeng@nuaa.edu.cn), [changkun@nuaa.edu.cn](mailto:changkun@nuaa.edu.cn)

| <b>Solid solution</b>                     | <b>Bandgap(eV)</b> |
|-------------------------------------------|--------------------|
| ZnS                                       | 3.30               |
| ZnIn <sub>2</sub> S <sub>4</sub>          | 2.32               |
| ZnIn <sub>2</sub> S <sub>4</sub> @ZnS-0.1 | 2.67               |
| ZnIn <sub>2</sub> S <sub>4</sub> @ZnS-0.2 | 2.79               |
| ZnIn <sub>2</sub> S <sub>4</sub> @ZnS-0.3 | 2.83               |
| ZnIn <sub>2</sub> S <sub>4</sub> @ZnS-0.4 | 2.80               |

**Table S1** Forbidden bandwidths of ZnS, ZnIn<sub>2</sub>S<sub>4</sub>, and ZnIn<sub>2</sub>S<sub>4</sub>@ZnS composites

**Table S2** The specific surface area of ZnS, ZnIn<sub>2</sub>S<sub>4</sub>, and ZnIn<sub>2</sub>S<sub>4</sub>@ZnS-0.3 composites

| Sample                                    | S <sub>BET</sub> (cm <sup>2</sup> g <sup>-1</sup> ) |
|-------------------------------------------|-----------------------------------------------------|
| ZnS                                       | 42.4                                                |
| ZnIn <sub>2</sub> S <sub>4</sub>          | 63.7                                                |
| ZnIn <sub>2</sub> S <sub>4</sub> @ZnS-0.3 | 122.3                                               |

| Sample                                    | $A_1$       | $\tau_1/\text{ns}$ | $A_2$       | $\tau_2/\text{ns}$ | $\tau_A/\text{ns}$ |
|-------------------------------------------|-------------|--------------------|-------------|--------------------|--------------------|
| ZnS                                       | 3669.462836 | 4.997448382        | 1.504421593 | 46.18591969        | 5.152923741        |
| ZnIn <sub>2</sub> S <sub>4</sub>          | 1.094521681 | 46.3660603         | 3647.438595 | 5.164508648        | 5.275209942        |
| ZnIn <sub>2</sub> S <sub>4</sub> @ZnS-0.1 | 1.061505896 | 50.37345998        | 3315.746995 | 6.050665775        | 6.168483548        |
| ZnIn <sub>2</sub> S <sub>4</sub> @ZnS-0.2 | 3002.544533 | 6.795660056        | 1.029964753 | 73.71889169        | 7.043769831        |
| ZnIn <sub>2</sub> S <sub>4</sub> @ZnS-0.3 | 2885.268962 | 7.339865278        | 1.63060833  | 80.36808148        | 7.788993527        |
| ZnIn <sub>2</sub> S <sub>4</sub> @ZnS-0.4 | 3175.184648 | 7.019308123        | 1.751626806 | 70.19563146        | 7.365927938        |

**Table S3** Fitting results for carrier lifetimes of ZnS, ZnIn<sub>2</sub>S<sub>4</sub>, and ZnIn<sub>2</sub>S<sub>4</sub>@ZnS composites

**Table S4** Comparison of the photocatalytic hydrogen production rates reported in the literature with those of the prepared ZnIn<sub>2</sub>S<sub>4</sub>/ZnS

| Photocatalysts                                          | The quality of sample | Sacrificial agent                                  | Light source (Xe lamp) | Activity (mmol g <sup>-1</sup> h <sup>-1</sup> ) | Ref.      |
|---------------------------------------------------------|-----------------------|----------------------------------------------------|------------------------|--------------------------------------------------|-----------|
| ZnIn <sub>2</sub> S <sub>4</sub> /ZnS                   | 100 mg                | Na <sub>2</sub> S/ Na <sub>2</sub> SO <sub>3</sub> | 300W<br>(λ≥420nm)      | 2.873                                            | This work |
| Ag <sub>2</sub> S/ZnIn <sub>2</sub> S <sub>4</sub> /ZnS | 100 mg                | Na <sub>2</sub> S/ Na <sub>2</sub> SO <sub>3</sub> | 300W<br>(λ≥420nm)      | 0.703                                            | 1         |
| ZIF-derived ZnS/ZnIn <sub>2</sub> S <sub>4</sub>        | 50 mg                 | TEOA                                               | 300W<br>(AM 1.5 G)     | 0.453                                            | 2         |
| ZnIn <sub>2</sub> S <sub>4</sub> /ZnS                   | 20 mg                 | Na <sub>2</sub> S/ Na <sub>2</sub> SO <sub>3</sub> | 300W                   | 8.502                                            | 3         |
| ZnIn <sub>2</sub> S <sub>4</sub> /CNTs/ZnS              | 50 mg                 | 10 vol% Methanol                                   | 300W<br>(λ≥420nm)      | 0.936                                            | 4         |
| ZnIn <sub>2</sub> S <sub>4</sub> /ZnS                   | 100 mg                | Na <sub>2</sub> S/ Na <sub>2</sub> SO <sub>3</sub> | 300W<br>(λ≥420nm)      | 2.633                                            | 5         |
| ZnO/ZnS                                                 | 10 mg                 | Na <sub>2</sub> S/ Na <sub>2</sub> SO <sub>3</sub> | 300W<br>(AM 1.5 G)     | 2.461                                            | 6         |
| ZnO/ZnS                                                 | 50 mg                 | Na <sub>2</sub> S/ Na <sub>2</sub> SO <sub>3</sub> | 300W<br>(AM 1.5 G)     | 0.500                                            | 7         |

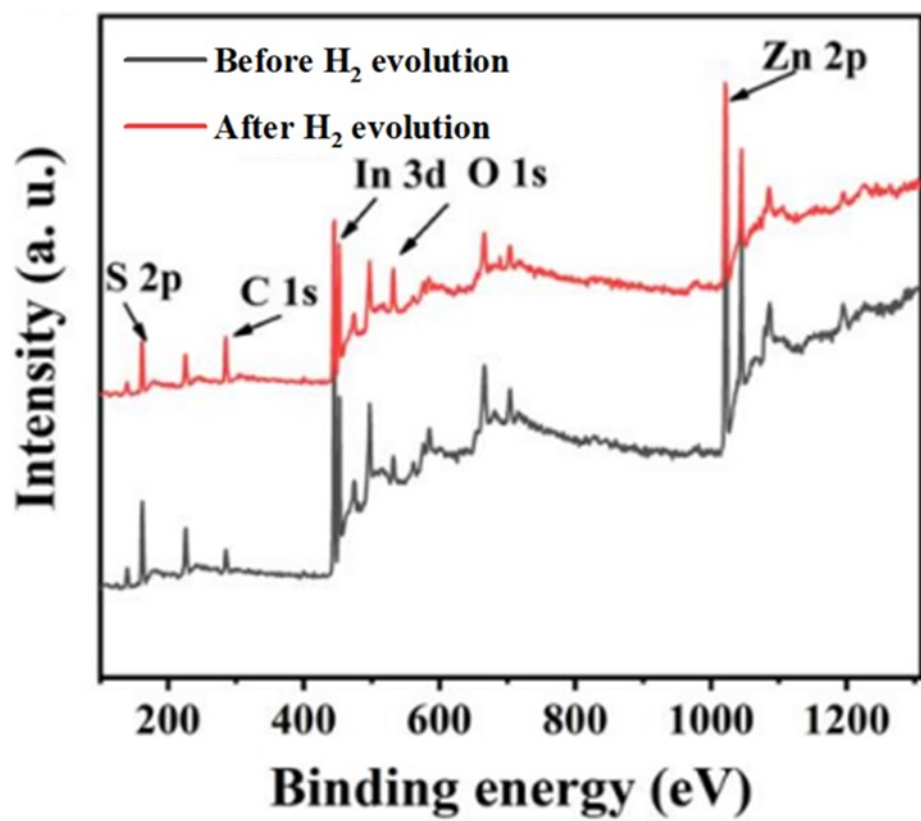

**Fig. S1** XPS images of ZnIn<sub>2</sub>S<sub>4</sub>@ZnS-0.3 before and after the hydrogen production cycle test

## Notes and references

- 1 R. Wang, L. Zhao, L. Li, Q. Song and J. Huang, *Journal of Physics and Chemistry of Solids*, 2020, **136**, 109148.
- 2 H. Song, N. Wang, H. Meng, Y. Han, J. Wu, J. Xu, Y. Xu, X. Zhang and T. Sun, *Dalton Trans.*, 2020, **49**, 10816–10823.
- 3 M. Li, S. Li, Y. Li, P. He, Y. Xiao, J. Chen and T. Ren, *Materials Letters*, 2023, **334**, 133757.
- 4 C. Zhang, K. Gao, H. Zhu, J. Liu, J. Chen, F. Xie, W. Xie and X. Wang, *ChemCatChem*, 2022, **14**, e202200225.
- 5 S. Liu, Y. Mao, Z. Su, F. Fang, K. Li, Y. Wu, P. Liu, P. Li and K. Chang, *Catal. Sci. Technol.*, 2023, 10.1039.D3CY00298E.
- 6 H. Ren, K. Ye, H. Chen, F. Wang, Y. Hu, Q. Shi, H. Yu, R. Lv and M. Chen, *Colloids and Surfaces A: Physicochemical and Engineering Aspects*, 2022, **652**, 129844.
- 7 V. Poliukhova, S. Khan, Z. Qiaohong, J. Zhang, D. Kim, S. Kim and S.-H. Cho, *Applied Surface Science*, 2022, **575**, 151773.
